# Supplementary material for: Short- and Long-Term Prediction of the Post-Pubertal Mandibular Length and Y-Axis in Females Utilizing Machine Learning
Source: MDPI journal article supplement (doi:10.3390/diagnostics13172729), 2023-08-22
Supplement: s1 [file s1]

**Supplementary Table S1.** Cephalometric variables and their definitions.

| Category                   | Measurements                           | Definitions                                                                                                                                            |
|----------------------------|----------------------------------------|--------------------------------------------------------------------------------------------------------------------------------------------------------|
| Maxilla to Cranial Base    | SNA (°)                                | The angle formed by connecting sella, nasion, and A-point                                                                                              |
|                            | SN-Palatal Plane (°)                   | The angle formed from the intersection of sella-nasion line and a line drawn connecting anterior nasal spine to posterior nasal spine                  |
|                            | SN-Occlusal Plane (°)                  | The angle formed from sella-nasion and occlusal plane                                                                                                  |
|                            | A-N Perpendicular (mm)                 | The linear distance from A point to the nasion perpendicular.                                                                                          |
| Mandible to Cranial Base   | SNB (°)                                | The angle formed by connecting sella, nasion, and B-point                                                                                              |
|                            | SNPg (°)                               | The angle formed by connecting sella, nasion, and pogonion                                                                                             |
|                            | FMA: MP-FH (°)                         | The angle formed from the intersection of porion-orbitale line and a line drawn connecting gonion to gnathion                                          |
|                            | SN-MP (°)                              | The angle formed from the intersection of sella-nasion line and a line drawn connecting gonion to gnathion                                             |
|                            | Mandibular Plane to Occlusal Plane (°) | The angle formed by mandibular plane and occlusal plane                                                                                                |
|                            | B-N Perpendicular (mm)                 | The linear distance from B point to nasion perpendicular                                                                                               |
|                            | Pog-N Perpendicular (mm)               | The linear distance from pogonion to nasion perpendicular                                                                                              |
|                            | Y-Axis: SGn-SN (°)                     | The angle formed by connecting nasion, sella, and gnathion                                                                                             |
| Maxilla to Mandible        | ANB (°)                                | The difference between SNA and SNB                                                                                                                     |
|                            | Palatal-Mandibular Angle (PP-MP) (°)   | The angle formed from palatal plane and mandibular plane                                                                                               |
|                            | Wits Appraisal (mm)                    | The distance between A point to Occlusal plane and B point to Occlusal plane                                                                           |
|                            | Maxillary Length: ANS-PNS (mm)         | The linear measurement between anterior nasal spine and posterior nasal spine                                                                          |
|                            | Mandibular Length: Co-Gn (mm)          | The linear measurement between condylion and gnathion                                                                                                  |
| Cranial Base               | Cranial Base Flexure Angle: Ba-S-N (°) | The angle formed by connecting basion, sella, and nasion                                                                                               |
| Upper Incisors to Maxilla  | U1-SN (°)                              | The angle formed from a line connecting sella to nasion and a line connecting the upper incisor incisal tip to the root apex                           |
|                            | U1-NA (°)                              | The angle formed from a line connecting nasion to A-point and a line connecting the upper incisor incisal tip to the root apex                         |
|                            | U1-NA (mm)                             | The linear measurement from the labial surface of the upper incisor to the line connecting nasion to A-point                                           |
|                            | U1-Palatal Plane (°)                   | The angle formed by the position of maxillary incisor to palatal plane                                                                                 |
|                            | U1 Protrusion (U1-APo) (mm)            | The distance from maxillary incisor to the A point-pogonion reference line                                                                             |
| Lower Incisors to Mandible | L1-MP (°)                              | The angle formed from a line connecting the lower incisor incisal tip to the root apex and a line connecting gonion to gnathion                        |
|                            | L1-NB (°)                              | The angle formed from a line connecting the lower incisor incisal tip to the root apex and a line connecting nasion to B-point                         |
|                            | L1-NB (mm)                             | The linear measurement from the labial surface of the lower incisor incisal to the line connecting nasion to B-point                                   |
|                            | L1 Protrusion (L1-Apo) (mm)            | The distance from mandibular incisor to the A point-pogonion reference line                                                                            |
| Incisors to Each Other     | Interincisal Angle (°)                 | The angle formed from a line connecting the lower incisor incisal tip to the apex and a line connecting the upper incisor incisal tip to the root apex |
|                            | Overjet (mm)                           | The horizontal distance from maxillary incisor tip to mandibular incisor tip                                                                           |
|                            | Overbite (mm)                          | The vertical distance from maxillary incisor tip to mandibular incisor tip                                                                             |
| Soft Tissue                | Upper Lip to E-Plane (mm)              | The linear distance from upper lip to a line connecting soft tissue pogonion and pronasale                                                             |
|                            | Lower Lip to E-Plane (mm)              | The linear distance from lower lip to a line connecting soft tissue pogonion and pronasale                                                             |
|                            | ILG (HP) (mm)                          | The vertical distance from stomion superius to stomion inferius                                                                                        |
|                            | Nasolabial Angle (Pn-Sn-UL) (°)        | The angle formed by pronasale, subnasale, and upper lip                                                                                                |
|                            | H-Angle (Pg'UL-Pg'Na') (°)             | The angle formed by soft tissue pogonion-upper lip to soft tissue pogonion-soft tissue nasion                                                          |

|         |                                             |                                                                                                                          |
|---------|---------------------------------------------|--------------------------------------------------------------------------------------------------------------------------|
| Profile | Facial Height (Na'-Me') (mm)                | The linear measurement from soft tissue nasion and soft tissue menton                                                    |
|         | Soft Tissue Upper Face Height: G'-Sn' (mm)  | The linear measurement between soft tissue glabella and soft tissue subnasale                                            |
|         | Soft Tissue Lower Face Height: Sn'-Me' (mm) | The linear measurement between soft tissue subnasale and soft tissue pogonion                                            |
|         | Hard Tissue Upper Face Height: N-ANS (mm)   | The linear measurement between nasion and anterior nasal spine                                                           |
|         | Hard Tissue Lower Face Height: ANS-Me (mm)  | The linear measurement between anterior nasal spine and menton                                                           |
|         | UFH (N-ANS/(N-ANS+ANS-Me)) (%)              | The ratio of the upper face height to facial height                                                                      |
|         | LFH (ANS-Me/(N-ANS+ANS-Me)) (%)             | The ratio of lower face height to facial height                                                                          |
|         | Posterior Face Height: Ar-Go (mm)           | The linear measurement between articulare and gonion                                                                     |
|         | PFH:AFH (Co-Go:N-Me) (%)                    | The ratio of posterior facial height to anterior facial height                                                           |
|         | Convexity: NA-APo (°)                       | The angle formed by connecting nasion, A-point, and pogonion                                                             |
|         | Facial Angle: FH-NPo (°)                    | The angle formed from a line connecting porion to orbitale and a line connecting nasion to pogonion                      |
|         | Holdaway Ratio (L1-NB:Pg-NB) (%)            | The ratio of the linear distance from the lower incisor to the NB line to the linear distance of pogonion to the NB line |
|         | Holdaway Angle (NB to H-line) (°)           | The angle formed by the H-line to NB line                                                                                |

**Supplementary Table S2.** Intra-examiner repeatability of the measurements.

| Measurements                       | Mean  | SD   | SE   | p-value | ICC  |
|------------------------------------|-------|------|------|---------|------|
| SNA                                | -0.28 | 0.75 | 0.24 | 0.269   | 0.97 |
| SN-Palatal Plane                   | -0.21 | 0.66 | 0.21 | 0.343   | 0.97 |
| Occlusal Plane to SN               | -0.30 | 0.96 | 0.30 | 0.348   | 0.98 |
| A-N Perpendicular (mm)             | -0.17 | 0.58 | 0.18 | 0.381   | 0.98 |
| SNB                                | -0.14 | 0.85 | 0.27 | 0.613   | 0.97 |
| SNPg                               | -0.39 | 1.06 | 0.34 | 0.275   | 0.95 |
| FMA (MP-FH)                        | 0.08  | 0.96 | 0.30 | 0.798   | 0.99 |
| SN - MP                            | 0.31  | 1.52 | 0.48 | 0.534   | 0.97 |
| Mandibular Plane to Occlusal Plane | 0.66  | 0.88 | 0.28 | 0.041   | 0.97 |
| B-N Perpendicular (mm)             | -0.03 | 0.95 | 0.30 | 0.922   | 0.99 |
| Pog-N Perpendicular (mm)           | -0.59 | 1.25 | 0.40 | 0.170   | 0.98 |
| Y-Axis (SGn-SN)                    | 0.24  | 0.66 | 0.21 | 0.277   | 0.98 |
| ANB                                | -0.15 | 0.24 | 0.08 | 0.081   | 0.99 |
| Palatal-Mandibular Angle (PP-MP)   | 0.58  | 0.94 | 0.30 | 0.082   | 0.98 |
| Wits Appraisal (mm)                | 0.17  | 0.49 | 0.16 | 0.303   | 0.98 |
| Maxillary length (ANS-PNS) (mm)    | 0.19  | 1.60 | 0.51 | 0.717   | 0.89 |
| Mandibular length (Co-Gn) (mm)     | -0.43 | 2.33 | 0.74 | 0.574   | 0.97 |
| Ba-S-N                             | -0.54 | 1.40 | 0.44 | 0.255   | 0.95 |
| U1 - SN                            | 0.25  | 2.30 | 0.73 | 0.739   | 0.92 |
| U1 - NA                            | 0.54  | 2.11 | 0.67 | 0.439   | 0.95 |
| U1 - NA (mm)                       | 0.18  | 0.53 | 0.17 | 0.311   | 0.95 |
| U1 - Palatal Plane                 | 0.04  | 2.06 | 0.65 | 0.952   | 0.95 |
| U1 Protrusion (U1-APo) (mm)        | 0.23  | 0.71 | 0.23 | 0.336   | 0.96 |
| L1 - MP                            | 0.95  | 1.55 | 0.49 | 0.084   | 0.96 |
| L1 - NB                            | 1.02  | 1.72 | 0.54 | 0.094   | 0.95 |
| L1 - NB (mm)                       | -0.05 | 0.59 | 0.19 | 0.794   | 0.96 |

|                                    |        |       |       |       |      |
|------------------------------------|--------|-------|-------|-------|------|
| L1 Protrusion (L1-APo) (mm)        | 0.17   | 0.74  | 0.23  | 0.485 | 0.87 |
| Interincisal Angle (U1-L1)         | -1.39  | 2.99  | 0.95  | 0.176 | 0.92 |
| Overjet                            | -0.02  | 0.16  | 0.05  | 0.705 | 0.99 |
| Overbite                           | -0.67  | 0.69  | 0.22  | 0.013 | 0.88 |
| Upper Lip to E-Plane (mm)          | 0.13   | 1.23  | 0.39  | 0.746 | 0.89 |
| Lower Lip to E-Plane (mm)          | 0.24   | 1.06  | 0.33  | 0.491 | 0.92 |
| ILG (HP) (mm)                      | 0.35   | 0.39  | 0.12  | 0.019 | 0.97 |
| Nasolabial Angle (Col-Sn-UL)       | 3.09   | 3.63  | 1.15  | 0.025 | 0.85 |
| H-Angle (Pg'UL-Pg'Na')             | 0.24   | 1.89  | 0.63  | 0.709 | 0.93 |
| UFH (G'-Sn') (mm)                  | 1.36   | 6.89  | 2.18  | 0.548 | 0.35 |
| LFH (Sn'-Me') (mm)                 | -0.32  | 1.26  | 0.40  | 0.444 | 0.94 |
| Upper Face Height (N-ANS) (mm)     | -0.06  | 0.64  | 0.20  | 0.774 | 0.99 |
| Lower Face Height (ANS-Me) (mm)    | -0.41  | 1.03  | 0.33  | 0.240 | 0.92 |
| UFH (N-ANS/(N-ANS+ANS-Me)) (%)     | 0.15   | 0.36  | 0.11  | 0.224 | 0.99 |
| LFH (ANS-Me/(N-ANS+ANS-Me)) (%)    | -0.15  | 0.36  | 0.11  | 0.224 | 0.99 |
| Posterior Face Height (Ar-Go) (mm) | 0.84   | 2.36  | 0.75  | 0.290 | 0.94 |
| PFH:AFH (Co-Go : N-Me) (%)         | 0.00   | 1.46  | 0.46  | 1.000 | 0.95 |
| Convexity (NA-APo)                 | 0.19   | 0.89  | 0.28  | 0.518 | 0.99 |
| Facial Angle (FH-NPo)              | -0.28  | 0.65  | 0.20  | 0.204 | 0.98 |
| Holdaway Ratio (L1-NB:Pg-NB) (%)   | -11.09 | 35.29 | 11.16 | 0.346 | 0.00 |
| Holdaway Angle (NB to H-line)      | 0.20   | 1.79  | 0.56  | 0.731 | 0.94 |

SD: Standard deviation, SE: standard error, ICC: intraclass correlation coefficient.

**Supplementary Table S3.** The descriptive statistics of the cephalometric measurements at T1, T2, and T3, including mean, standard deviation, and minimum/maximum values.

| Measurements                       | T1     |      |        |        | T2     |      |        |        | T3     |      |        |        |
|------------------------------------|--------|------|--------|--------|--------|------|--------|--------|--------|------|--------|--------|
|                                    | Mean   | SD   | Min    | Max    | Mean   | SD   | Min    | Max    | Mean   | SD   | Min    | Max    |
| SNA                                | 79.58  | 3.12 | 70.50  | 87.20  | 80.01  | 3.36 | 71.70  | 89.50  | 80.10  | 3.27 | 71.60  | 88.40  |
| SN-Palatal Plane                   | 8.58   | 2.89 | -2.30  | 14.20  | 8.46   | 3.03 | -0.70  | 16.30  | 8.44   | 3.10 | -0.30  | 16.20  |
| Occlusal Plane to SN               | 19.41  | 3.65 | 10.60  | 29.40  | 18.13  | 4.14 | 7.10   | 27.20  | 16.97  | 4.22 | 4.70   | 25.50  |
| A-N Perpendicular (mm)             | -2.06  | 3.44 | -12.70 | 8.90   | -1.69  | 3.26 | -12.40 | 5.70   | -1.64  | 3.66 | -15.50 | 6.70   |
| SNB                                | 76.45  | 3.09 | 67.90  | 85.10  | 77.34  | 3.24 | 69.80  | 88.00  | 77.76  | 3.41 | 69.60  | 87.40  |
| SNPg                               | 77.12  | 3.19 | 68.80  | 85.20  | 78.15  | 3.36 | 70.50  | 87.60  | 78.85  | 3.53 | 70.90  | 87.40  |
| FMA (MP-FH)                        | 28.34  | 4.40 | 18.40  | 39.90  | 27.49  | 4.39 | 16.90  | 38.40  | 26.88  | 4.81 | 14.40  | 41.00  |
| SN - MP                            | 34.22  | 4.47 | 23.00  | 46.50  | 33.43  | 4.72 | 21.30  | 47.00  | 32.65  | 5.10 | 19.20  | 46.90  |
| Mandibular Plane to Occlusal Plane | 15.81  | 2.99 | 8.90   | 23.00  | 16.24  | 3.11 | 8.60   | 23.70  | 16.70  | 3.68 | 7.30   | 26.20  |
| B-N Perpendicular (mm)             | -8.38  | 5.39 | -23.70 | 5.20   | -7.18  | 5.16 | -24.90 | 5.80   | -6.71  | 5.97 | -28.10 | 8.40   |
| Pog-N Perpendicular (mm)           | -8.30  | 6.06 | -24.20 | 5.60   | -6.65  | 5.95 | -26.60 | 8.10   | -5.54  | 6.79 | -29.00 | 10.20  |
| Y-Axis (SGn-SN)                    | 68.19  | 3.11 | 58.90  | 76.20  | 67.95  | 3.28 | 57.40  | 76.00  | 67.85  | 3.48 | 58.40  | 76.30  |
| ANB                                | 3.13   | 1.94 | -2.80  | 7.60   | 2.68   | 1.94 | -2.60  | 7.50   | 2.33   | 2.12 | -3.00  | 8.00   |
| Palatal-Mandibular Angle (PP-MP)   | 26.65  | 4.31 | 13.10  | 37.70  | 25.92  | 4.50 | 13.80  | 40.30  | 25.23  | 4.88 | 12.90  | 39.70  |
| Wits Appraisal (mm)                | -0.74  | 2.36 | -7.30  | 4.40   | -0.93  | 2.49 | -8.80  | 5.90   | -0.81  | 2.92 | -8.70  | 5.10   |
| Maxillary length (ANS-PNS) (mm)    | 48.79  | 3.15 | 41.70  | 57.50  | 50.53  | 3.35 | 42.80  | 59.90  | 52.22  | 3.61 | 39.20  | 61.20  |
| Mandibular length (Co-Gn) (mm)     | 110.43 | 6.09 | 95.50  | 135.60 | 115.68 | 6.58 | 101.40 | 133.60 | 120.71 | 6.75 | 103.50 | 138.90 |

|                                    |        |       |         |        |        |       |         |        |        |       |         |        |
|------------------------------------|--------|-------|---------|--------|--------|-------|---------|--------|--------|-------|---------|--------|
| Ba-S-N                             | 129.71 | 4.15  | 120.90  | 141.70 | 129.74 | 4.19  | 120.70  | 141.40 | 129.89 | 4.51  | 118.90  | 141.10 |
| U1 - SN                            | 103.17 | 6.23  | 84.80   | 120.80 | 103.32 | 6.49  | 88.50   | 124.30 | 103.25 | 6.91  | 85.30   | 123.20 |
| U1 - NA                            | 23.59  | 5.67  | 7.70    | 42.70  | 23.31  | 6.16  | 8.50    | 39.10  | 23.15  | 6.53  | 4.70    | 38.10  |
| U1 - NA (mm)                       | 4.16   | 1.95  | -1.00   | 11.60  | 4.61   | 2.34  | -1.60   | 11.40  | 5.01   | 2.54  | -2.50   | 12.00  |
| U1 - Palatal Plane                 | 111.75 | 5.80  | 95.70   | 128.60 | 111.77 | 5.96  | 97.70   | 129.60 | 111.69 | 6.12  | 97.00   | 129.20 |
| U1 Protrusion (U1-APo) (mm)        | 6.03   | 1.81  | 1.90    | 10.30  | 6.10   | 2.10  | 1.10    | 11.90  | 6.05   | 2.27  | -0.10   | 11.90  |
| L1 - MP                            | 90.54  | 5.98  | 75.10   | 106.80 | 90.63  | 6.21  | 73.30   | 106.90 | 90.42  | 6.45  | 74.10   | 111.10 |
| L1 - NB                            | 23.63  | 5.61  | 6.20    | 36.10  | 23.80  | 5.96  | 7.60    | 37.70  | 23.41  | 5.88  | 8.30    | 40.20  |
| L1 - NB (mm)                       | 4.36   | 1.79  | -0.60   | 8.80   | 4.40   | 1.96  | -0.80   | 9.70   | 4.52   | 2.08  | -0.80   | 9.70   |
| L1 Protrusion (L1-APo) (mm)        | 2.02   | 1.85  | -2.20   | 6.90   | 2.14   | 1.91  | -2.60   | 8.00   | 2.19   | 2.02  | -2.50   | 8.50   |
| Interincisal Angle (U1-L1)         | 129.65 | 8.10  | 107.00  | 149.60 | 130.21 | 8.91  | 109.80  | 158.70 | 131.10 | 9.15  | 108.10  | 154.20 |
| Overjet                            | 4.11   | 1.53  | -3.30   | 8.10   | 4.11   | 1.35  | 0.80    | 8.70   | 4.00   | 1.30  | 1.10    | 9.00   |
| Overbite                           | 1.58   | 1.99  | -6.20   | 5.50   | 2.12   | 1.73  | -2.40   | 5.70   | 1.97   | 1.85  | -6.20   | 5.60   |
| Upper Lip to E-Plane (mm)          | -2.47  | 2.18  | -8.60   | 3.40   | -3.15  | 2.19  | -9.30   | 1.70   | -4.11  | 2.33  | -10.30  | 3.80   |
| Lower Lip to E-Plane (mm)          | -0.30  | 2.20  | -5.10   | 4.20   | -0.83  | 2.57  | -6.50   | 5.50   | -1.54  | 2.44  | -7.80   | 4.80   |
| ILG (HP) (mm)                      | 2.87   | 2.84  | 0.50    | 13.90  | 2.78   | 2.72  | 0.40    | 13.60  | 2.37   | 2.35  | 0.50    | 11.80  |
| Nasolabial Angle (Col-Sn-UL)       | 115.28 | 9.64  | 83.90   | 141.20 | 115.43 | 8.42  | 85.80   | 133.80 | 113.15 | 8.68  | 87.30   | 130.90 |
| H-Angle (Pg'UL-Pg'Na')             | 14.96  | 4.13  | 4.60    | 28.20  | 14.81  | 4.03  | 0.90    | 22.20  | 13.98  | 4.14  | 3.80    | 25.40  |
| UFH (G'-Sn') (mm)                  | 68.05  | 6.38  | 53.40   | 91.10  | 70.94  | 6.37  | 55.40   | 93.80  | 72.64  | 6.02  | 57.20   | 87.60  |
| LFH (Sn'-Me') (mm)                 | 66.22  | 4.38  | 54.70   | 76.40  | 69.10  | 5.18  | 56.10   | 83.20  | 71.00  | 4.86  | 59.00   | 83.60  |
| Upper Face Height (N-ANS) (mm)     | 49.92  | 3.38  | 41.70   | 61.30  | 52.28  | 3.49  | 43.30   | 63.40  | 53.92  | 3.40  | 43.80   | 66.80  |
| Lower Face Height (ANS-Me) (mm)    | 61.18  | 4.03  | 52.00   | 71.40  | 63.22  | 4.43  | 53.10   | 77.40  | 65.63  | 4.90  | 51.70   | 78.10  |
| UFH (N-ANS/(N-ANS+ANS-Me)) (%)     | 44.94  | 1.89  | 38.70   | 49.90  | 45.27  | 1.86  | 39.10   | 49.20  | 45.15  | 1.99  | 39.70   | 50.50  |
| LFH (ANS-Me/(N-ANS+ANS-Me)) (%)    | 55.06  | 1.89  | 50.10   | 61.30  | 54.73  | 1.86  | 50.80   | 60.90  | 54.88  | 1.95  | 49.90   | 60.30  |
| Posterior Face Height (Ar-Go) (mm) | 40.73  | 3.69  | 32.40   | 54.80  | 43.34  | 4.00  | 33.70   | 54.20  | 45.91  | 4.17  | 36.40   | 56.20  |
| PFH:AFH (Co-Go : N-Me) (%)         | 51.91  | 3.37  | 44.10   | 61.40  | 52.47  | 3.57  | 43.60   | 61.90  | 53.41  | 3.93  | 43.80   | 64.90  |
| Convexity (NA-APo)                 | 5.23   | 4.93  | -11.40  | 16.80  | 3.95   | 5.06  | -10.30  | 18.20  | 2.63   | 5.41  | -11.50  | 17.00  |
| Facial Angle (FH-NPo)              | 85.42  | 3.31  | 77.20   | 93.30  | 86.50  | 3.12  | 76.90   | 94.50  | 87.20  | 3.40  | 75.90   | 95.30  |
| Holdaway Ratio (L1-NB:Pg-NB) (%)   | -1.95  | 33.54 | -212.90 | 253.80 | -0.17  | 22.84 | -286.60 | 32.00  | 2.47   | 31.63 | -129.60 | 314.10 |
| Holdaway Angle (NB to H-line)      | 11.57  | 4.50  | -0.10   | 24.40  | 11.10  | 4.47  | -1.80   | 19.20  | 9.78   | 4.60  | -1.00   | 21.50  |

SD: Standard deviation, Min: minimum, Max: maximum.
